# Supplementary material for: Peritoneal metastasis of colorectal cancer (pmCRC): identification of predictive molecular signatures by a novel preclinical platform of matching pmCRC PDX/PD3D models
Source: PubMed Central journal article supplement (PMC8529724; doi:10.1186/s12943-021-01430-7), 2021-10-21
Supplement: 12943_2021_1430_MOESM7_ESM.pdf [file 12943_2021_1430_MOESM7_ESM.pdf]

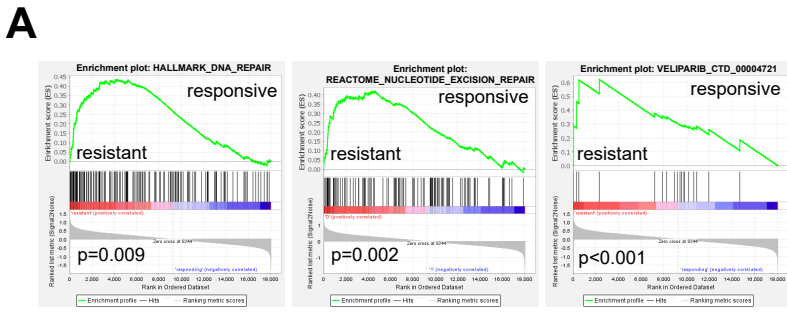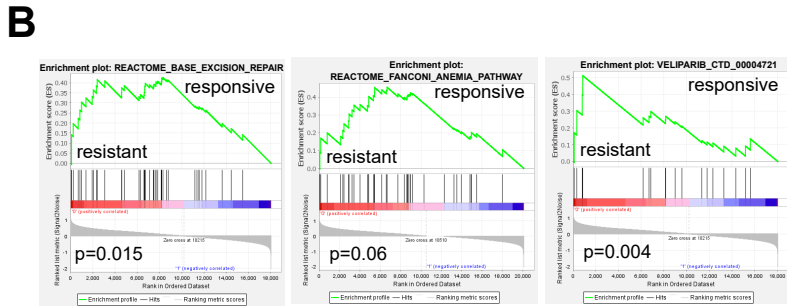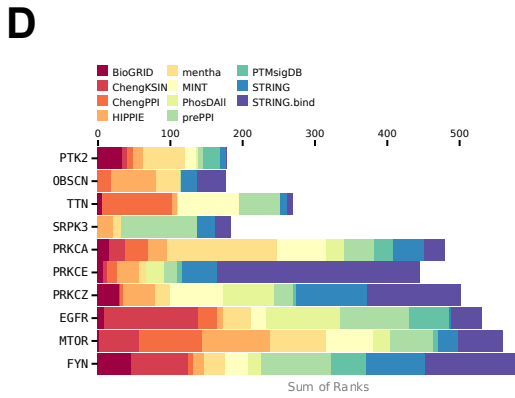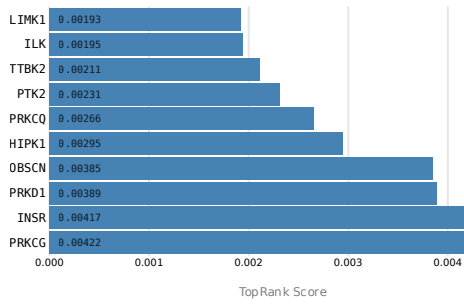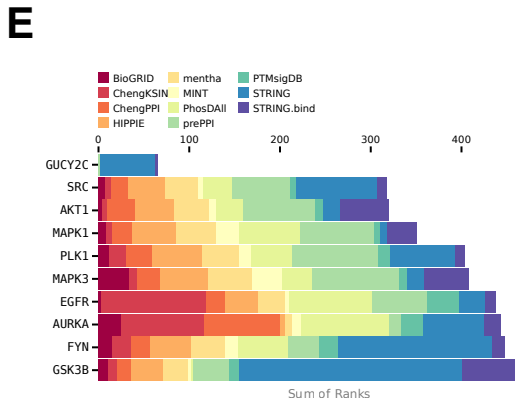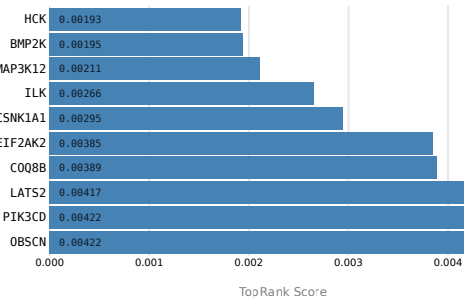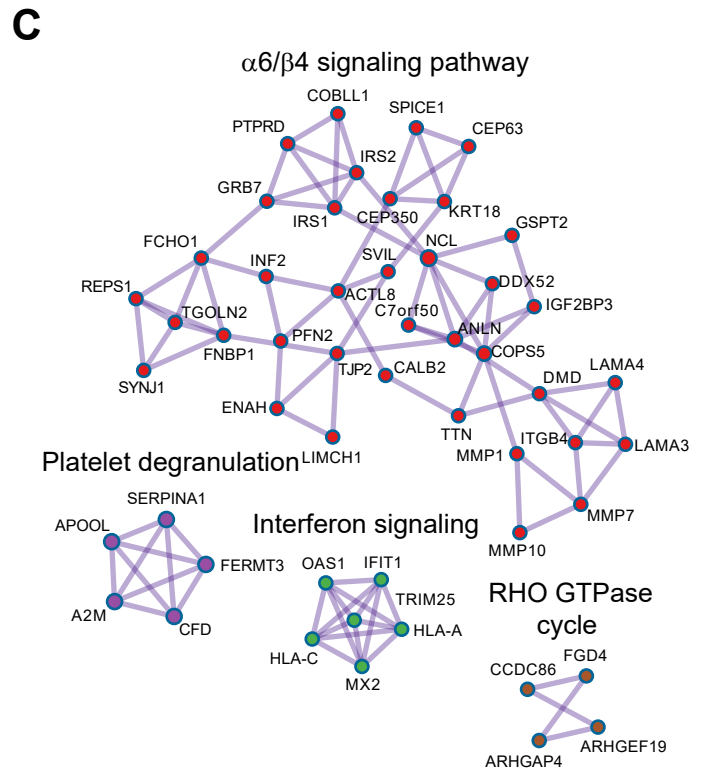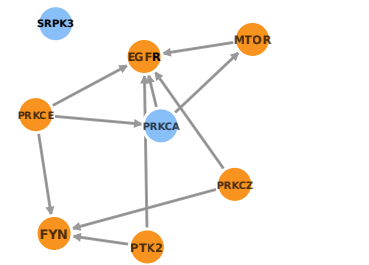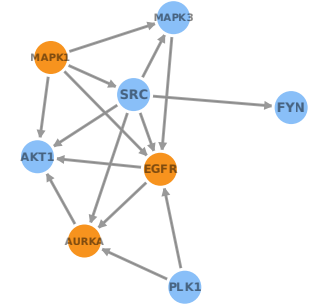

Supplementary Figure S7, Dahlmann et al., Molecular Cancer 2021
