# Supplementary material for: Peritoneal metastasis of colorectal cancer (pmCRC): identification of predictive molecular signatures by a novel preclinical platform of matching pmCRC PDX/PD3D models
Source: PubMed Central journal article supplement (PMC8529724; doi:10.1186/s12943-021-01430-7), 2021-10-21
Supplement: 12943_2021_1430_MOESM8_ESM.pdf [file 12943_2021_1430_MOESM8_ESM.pdf]

**A**

|        |                     | 5-FU [ $\mu$ M] |          |          |          |          |          |
|--------|---------------------|-----------------|----------|----------|----------|----------|----------|
|        |                     | 0               | 0.01     | 0.1      | 1        | 10       |          |
| CRC-09 | Olaparib [ $\mu$ M] | 0               | 1.24E+06 | 1.24E+06 | 3.16E+06 | 2.37E+06 | 2.49E+06 |
|        | 2.5                 | 2.26E+06        | 1.86E+06 | 2.08E+06 | 1.99E+06 | 6.35E+05 |          |
|        | 5                   | 2.19E+06        | 1.09E+06 | 1.44E+06 | 1.88E+06 | 1.94E+06 |          |
|        | 10                  | 2.22E+06        | 1.04E+06 | 1.55E+06 | 2.81E+06 | 1.71E+06 |          |
|        | 15                  | 2.14E+06        | 1.90E+06 | 1.47E+06 | 2.10E+06 | 1.89E+06 |          |
|        |                     |                 |          |          |          |          |          |

**B**

|         |                     | Trametinib [ $\mu$ M] |          |          |          |          |          |
|---------|---------------------|-----------------------|----------|----------|----------|----------|----------|
|         |                     | 0                     | 0.001    | 0.01     | 0.1      | 1        |          |
| CRC-05A | Olaparib [ $\mu$ M] | 0                     | 2.42E+06 | 4.45E+06 | 4.51E+06 | 4.53E+06 | 4.66E+06 |
|         | 2.5                 | 4.34E+06              | 2.27E+06 | 2.59E+06 | 1.63E+06 | 1.74E+06 |          |
|         | 5                   | 3.48E+06              | 2.32E+06 | 2.14E+06 | 1.58E+06 | 2.51E+06 |          |
|         | 10                  | 3.11E+06              | 1.29E+06 | 2.13E+06 | 1.63E+06 | 3.27E+06 |          |
|         | 15                  | 3.69E+06              | 2.21E+06 | 2.52E+06 | 4.46E+06 | 3.00E+06 |          |
|         |                     |                       |          |          |          |          |          |

**C**

|         |                     | 5-FU [ $\mu$ M] |          |          |          |          |          |
|---------|---------------------|-----------------|----------|----------|----------|----------|----------|
|         |                     | 0               | 0.01     | 0.1      | 1        | 10       |          |
| CRC-05A | Olaparib [ $\mu$ M] | 0               | 3.07E+05 | 4.69E+05 | 5.72E+05 | 6.68E+05 | 6.17E+05 |
|         | 2.5                 | 4.29E+05        | 6.38E+05 | 5.20E+05 | 6.35E+05 | 5.99E+05 |          |
|         | 5                   | 6.03E+05        | 5.07E+05 | 6.37E+05 | 5.45E+05 | 5.80E+05 |          |
|         | 10                  | 5.43E+05        | 6.29E+05 | 5.66E+05 | 5.54E+05 | 5.63E+05 |          |
|         | 15                  | 6.86E+05        | 6.98E+05 | 4.95E+05 | 5.94E+05 | 6.12E+05 |          |
|         |                     |                 |          |          |          |          |          |

**D**

|        |                     | Trametinib [ $\mu$ M] |          |          |          |          |          |
|--------|---------------------|-----------------------|----------|----------|----------|----------|----------|
|        |                     | 0                     | 0.001    | 0.01     | 0.1      | 1        |          |
| CRC-09 | Olaparib [ $\mu$ M] | 0                     | 1.04E+06 | 1.00E+06 | 2.60E+06 | 1.71E+06 | 2.93E+06 |
|        | 2.5                 | 1.21E+06              | 6.65E+05 | 1.36E+06 | 1.57E+06 | 1.04E+06 |          |
|        | 5                   | 1.38E+06              | 1.19E+06 | 1.32E+06 | 1.22E+06 | 1.35E+06 |          |
|        | 10                  | 1.88E+06              | 8.79E+05 | 1.58E+06 | 1.71E+06 | 1.82E+06 |          |
|        | 15                  | 2.36E+06              | 5.98E+05 | 6.70E+05 | 2.25E+06 | 1.87E+06 |          |
|        |                     |                       |          |          |          |          |          |

|         |                     | 5-FU [ $\mu$ M] |          |          |          |          |          |
|---------|---------------------|-----------------|----------|----------|----------|----------|----------|
|         |                     | 0               | 0.01     | 0.1      | 1        | 10       |          |
| CRC-19A | Olaparib [ $\mu$ M] | 0               | 1.41E+06 | 1.36E+06 | 1.80E+06 | 1.66E+06 | 1.65E+06 |
|         | 2.5                 | 1.64E+06        | 1.48E+06 | 1.96E+06 | 1.97E+06 | 1.75E+06 |          |
|         | 5                   | 1.98E+06        | 2.22E+06 | 1.69E+06 | 1.76E+06 | 1.87E+06 |          |
|         | 10                  | 1.72E+06        | 1.80E+06 | 2.18E+06 | 1.47E+06 | 1.71E+06 |          |
|         | 15                  | 1.64E+06        | 1.42E+06 | 1.52E+06 | 1.29E+06 | 1.31E+06 |          |
|         |                     |                 |          |          |          |          |          |

|        |                     | Trametinib [ $\mu$ M] |          |          |          |          |          |
|--------|---------------------|-----------------------|----------|----------|----------|----------|----------|
|        |                     | 0                     | 0.001    | 0.01     | 0.1      | 1        |          |
| CRC-21 | Olaparib [ $\mu$ M] | 0                     | 9.05E+04 | 9.45E+04 | 1.31E+05 | 1.24E+05 | 9.78E+04 |
|        | 2.5                 | 8.47E+04              | 9.11E+04 | 9.99E+04 | 1.06E+05 | 1.18E+05 |          |
|        | 5                   | 1.01E+05              | 1.14E+05 | 9.45E+04 | 1.14E+05 | 1.00E+05 |          |
|        | 10                  | 8.79E+04              | 9.82E+04 | 9.46E+04 | 8.50E+04 | 1.30E+05 |          |
|        | 15                  | 1.30E+05              | 1.16E+05 | 1.52E+05 | 8.37E+04 | 1.20E+05 |          |
|        |                     |                       |          |          |          |          |          |

|         |                     | 5-FU [ $\mu$ M] |          |          |          |          |          |
|---------|---------------------|-----------------|----------|----------|----------|----------|----------|
|         |                     | 0               | 0.01     | 0.1      | 1        | 10       |          |
| CRC-28B | Olaparib [ $\mu$ M] | 0               | 6.96E+05 | 8.98E+05 | 7.67E+05 | 8.14E+05 | 1.10E+06 |
|         | 2.5                 | 6.73E+05        | 6.92E+05 | 9.42E+05 | 8.83E+05 | 8.50E+05 |          |
|         | 5                   | 8.20E+05        | 7.57E+05 | 8.79E+05 | 8.99E+05 | 8.91E+05 |          |
|         | 10                  | 9.77E+05        | 7.39E+05 | 8.79E+05 | 8.74E+05 | 6.83E+05 |          |
|         | 15                  | 9.51E+05        | 8.63E+05 | 7.31E+05 | 9.18E+05 | 8.79E+05 |          |
|         |                     |                 |          |          |          |          |          |

|         |                     | Trametinib [ $\mu$ M] |          |          |          |          |          |
|---------|---------------------|-----------------------|----------|----------|----------|----------|----------|
|         |                     | 0                     | 0.001    | 0.01     | 0.1      | 1        |          |
| CRC-55A | Olaparib [ $\mu$ M] | 0                     | 1.29E+06 | 1.95E+06 | 1.58E+06 | 1.64E+06 | 1.57E+06 |
|         | 2.5                 | 1.44E+06              | 1.40E+06 | 1.07E+06 | 1.28E+06 | 1.20E+06 |          |
|         | 5                   | 1.56E+06              | 1.33E+06 | 1.43E+06 | 1.25E+06 | 1.07E+06 |          |
|         | 10                  | 1.24E+06              | 1.40E+06 | 1.34E+06 | 1.56E+06 | 1.43E+06 |          |
|         | 15                  | 1.35E+06              | 1.61E+06 | 1.49E+06 | 1.52E+06 | 1.31E+06 |          |
|         |                     |                       |          |          |          |          |          |

|         |                     | 5-FU [ $\mu$ M] |          |          |          |          |          |
|---------|---------------------|-----------------|----------|----------|----------|----------|----------|
|         |                     | 0               | 0.01     | 0.1      | 1        | 10       |          |
| CRC-55A | Olaparib [ $\mu$ M] | 0               | 2.56E+06 | 3.44E+06 | 3.22E+06 | 2.95E+06 | 2.98E+06 |
|         | 2.5                 | 2.95E+06        | 1.73E+06 | 1.51E+06 | 1.86E+06 | 2.22E+06 |          |
|         | 5                   | 2.40E+06        | 2.19E+06 | 1.69E+06 | 1.93E+06 | 1.54E+06 |          |
|         | 10                  | 2.38E+06        | 2.56E+06 | 2.02E+06 | 1.83E+06 | 2.00E+06 |          |
|         | 15                  | 2.64E+06        | 2.59E+06 | 2.95E+06 | 2.57E+06 | 2.11E+06 |          |
|         |                     |                 |          |          |          |          |          |

|         |                     | Trametinib [ $\mu$ M] |          |          |          |          |          |
|---------|---------------------|-----------------------|----------|----------|----------|----------|----------|
|         |                     | 0                     | 0.001    | 0.01     | 0.1      | 1        |          |
| CRC-55B | Olaparib [ $\mu$ M] | 0                     | 5.40E+05 | 6.72E+05 | 7.47E+05 | 7.78E+05 | 8.19E+05 |
|         | 2.5                 | 7.76E+05              | 6.50E+05 | 5.60E+05 | 5.85E+05 | 6.31E+05 |          |
|         | 5                   | 7.17E+05              | 7.29E+05 | 9.57E+05 | 6.11E+05 | 6.24E+05 |          |
|         | 10                  | 7.99E+05              | 8.23E+05 | 7.95E+05 | 8.64E+05 | 8.45E+05 |          |
|         | 15                  | 8.15E+05              | 8.91E+05 | 8.53E+05 | 7.44E+05 | 7.21E+05 |          |
|         |                     |                       |          |          |          |          |          |

|         |                     | 5-FU [ $\mu$ M] |          |          |          |          |          |
|---------|---------------------|-----------------|----------|----------|----------|----------|----------|
|         |                     | 0               | 0.01     | 1        | 10       | 10       |          |
| CRC-55B | Olaparib [ $\mu$ M] | 0               | 2.00E+06 | 2.90E+06 | 2.80E+06 | 2.46E+06 | 2.41E+06 |
|         | 2.5                 | 2.55E+06        | 1.83E+06 | 1.84E+06 | 2.26E+06 | 2.07E+06 |          |
|         | 5                   | 2.36E+06        | 7.09E+05 | 1.05E+06 | 8.60E+05 | 1.49E+06 |          |
|         | 10                  | 2.39E+06        | 6.36E+05 | 5.76E+05 | 5.28E+05 | 4.58E+05 |          |
|         | 15                  | 2.83E+06        | 1.10E+06 | 1.06E+06 | 1.30E+06 | 8.52E+05 |          |
|         |                     |                 |          |          |          |          |          |

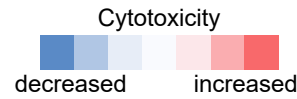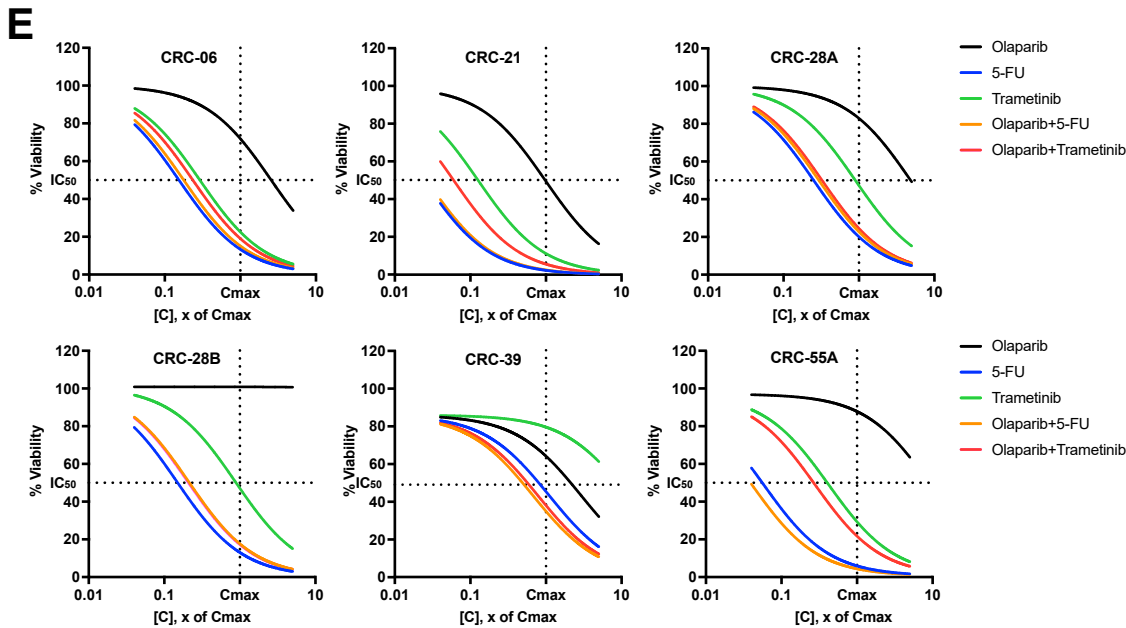

Supplementary Figure S8, Dahlmann et al., Molecular Cancer 2021
